# Supplementary material for: Systematic Review of Research and Interventions With Frequent Callers to Suicide Prevention Helplines and Crisis Centers
Source: PubMed Central journal article supplement — Crisis. 2022 Jan 28;44(2):154–67. doi: 10.1027/0227-5910/a000838 (PMC10102973; doi:10.1027/0227-5910/a000838), 2022-01-28
Supplement: cri_44_2_154_esm1.pdf [file cri_44_2_154_esm1.pdf]

Electronic Supplementary Material 1

Details of syntax used in searches

| PsychINfo  |                                                                                                                                                                                                                                                                                                                                                                                                                                                                                                                                                                                                                                                                                                                                                                                                                                                                                                                                                                                                                                                                                                                                                                                                                                                                                                                                                                                                                                                                                                                                                                                                                                                                                                                                      |         |
|------------|--------------------------------------------------------------------------------------------------------------------------------------------------------------------------------------------------------------------------------------------------------------------------------------------------------------------------------------------------------------------------------------------------------------------------------------------------------------------------------------------------------------------------------------------------------------------------------------------------------------------------------------------------------------------------------------------------------------------------------------------------------------------------------------------------------------------------------------------------------------------------------------------------------------------------------------------------------------------------------------------------------------------------------------------------------------------------------------------------------------------------------------------------------------------------------------------------------------------------------------------------------------------------------------------------------------------------------------------------------------------------------------------------------------------------------------------------------------------------------------------------------------------------------------------------------------------------------------------------------------------------------------------------------------------------------------------------------------------------------------|---------|
| #iteration | Syntaxe                                                                                                                                                                                                                                                                                                                                                                                                                                                                                                                                                                                                                                                                                                                                                                                                                                                                                                                                                                                                                                                                                                                                                                                                                                                                                                                                                                                                                                                                                                                                                                                                                                                                                                                              | #Hits   |
| 1          | (((AnyField:(algorithm))) OR ((AnyField:(artificial intelligence))) OR ((AnyField:(computational intelligence))) OR ((AnyField:(big data))) OR ((AnyField:(data mining))) OR ((AnyField:(Pattern Discrimination))) OR ((AnyField:(Pattern Recognition))) OR ((AnyField:(Artificial Intelligence))) OR ((AnyField:(Automated Information Processing))) OR ((it:(Machine Learning))) OR ((AnyField:(neural network))) OR ((AnyField:(neural networks))) OR ((AnyField:(Artificial Neural Networks))) OR ((it:(Computational Modeling))) OR (AnyField:(facebook)) OR (AnyField:(internet)) OR (AnyField:(online)) OR (AnyField:(twitter)) OR (AnyField:(big data)) OR (AnyField:(cyber*)) OR (AnyField:(instagram)) OR (AnyField:(snapchat)) OR (AnyField:(periscope)) OR (AnyField:(ask.fm)) OR (AnyField:(internet)) OR (AnyField:(deep learning))) OR (((AnyField:(mobile)) AND (AnyField:(tech*))) OR (ti:(social media))) OR (abstract:(social media)) OR (ti:(electronic health record)) OR (abstract:(electronic health record)) OR (it:(Data mining)) OR (AnyField:(mining)) OR (AnyField:(neural network)) OR (AnyField:(neural networking)) OR (AnyField:(neural networks)) OR (AnyField:(neural networksbased)) OR (it:(artificial intelligence)) OR ((AnyField:(artificial)) AND (AnyField:(intelligence))) OR (AnyField:(artificial intelligence)) OR ((AnyField:(computational)) AND (AnyField:(intelligence))) OR (AnyField:(computational intelligence)) OR (it:(Computer Assisted language Learning)) OR ((AnyField:(natural)) AND (AnyField:(language)) AND (AnyField:(processing))) OR (AnyField:(natural language processing)) OR (it:(computer applications)) OR (it:(Cellular Phones)) OR (it:(text Messaging)))) | 394 158 |
| 2          | (((KEYWORDS:frequent* OR KEYWORDS:chronic*) AND (KEYWORDS:call* OR KEYWORDS:user*)) OR (KEYWORDS: "Help Seeking Behavior" AND sKEYWORDS:ucid*) OR (KEYWORDS: "Relapse (Disorders)" AND sKEYWORDS:suicid*) OR KEYWORDS: "repetitive self-harm" OR (KEYWORDS:repeat* NEAR/3 (KEYWORDS:call* OR KEYWORDS:user*)) OR (KEYWORDS:Repetit* NEAR/3 (KEYWORDS:call* OR KEYWORDS:user*)) OR (KEYWORDS: recidiv* NEAR/3 (KEYWORDS:call* OR KEYWORDS:user*)))                                                                                                                                                                                                                                                                                                                                                                                                                                                                                                                                                                                                                                                                                                                                                                                                                                                                                                                                                                                                                                                                                                                                                                                                                                                                                    | 13 894  |
| 3          | (((KEYWORDS:frequent* OR KEYWORDS:chronic*) AND (KEYWORDS:call* OR KEYWORDS:user*)) OR (KEYWORDS: "Help Seeking Behavior" AND sKEYWORDS:ucid*) OR (KEYWORDS: "Relapse (Disorders)" AND sKEYWORDS:suicid*) OR KEYWORDS: "repetitive self-harm" OR (KEYWORDS:repeat* NEAR/3 (KEYWORDS:call* OR KEYWORDS:user*)) OR (KEYWORDS:Repetit* NEAR/3 (KEYWORDS:call* OR KEYWORDS:user*)) OR (KEYWORDS: recidiv* NEAR/3 (KEYWORDS:call* OR KEYWORDS:user*)))                                                                                                                                                                                                                                                                                                                                                                                                                                                                                                                                                                                                                                                                                                                                                                                                                                                                                                                                                                                                                                                                                                                                                                                                                                                                                    | 885     |
| 4          | 1 and 2                                                                                                                                                                                                                                                                                                                                                                                                                                                                                                                                                                                                                                                                                                                                                                                                                                                                                                                                                                                                                                                                                                                                                                                                                                                                                                                                                                                                                                                                                                                                                                                                                                                                                                                              | 1060    |
| 5          | 1 AND 3                                                                                                                                                                                                                                                                                                                                                                                                                                                                                                                                                                                                                                                                                                                                                                                                                                                                                                                                                                                                                                                                                                                                                                                                                                                                                                                                                                                                                                                                                                                                                                                                                                                                                                                              |         |
| 6          | (((KEYWORDS:(algorithm))) OR ((KEYWORDS:(artificial intelligence))) OR ((KEYWORDS:(computational intelligence))) OR ((KEYWORDS:(big data))) OR ((KEYWORDS:(data mining))) OR ((KEYWORDS:(Pattern Discrimination))) OR ((KEYWORDS:(Pattern Recognition))) OR ((KEYWORDS:(Artificial Intelligence))) OR                                                                                                                                                                                                                                                                                                                                                                                                                                                                                                                                                                                                                                                                                                                                                                                                                                                                                                                                                                                                                                                                                                                                                                                                                                                                                                                                                                                                                                | 472     |

|     |                                                                                                                                                                                                                                                                                                                                                                                                                                                                                                                                                                                                                                                                                                                                                                                                                                                                                                                                                                                                                                                                                                                                                                                                                                                                                                                                                                                                                                                                                                                                                                                                                                                                                                                                                                                                                                                                                                                                                                                                                                                                                                                                                                                                                                                                                                                                                                                                                                                                                                                                                                |        |
|-----|----------------------------------------------------------------------------------------------------------------------------------------------------------------------------------------------------------------------------------------------------------------------------------------------------------------------------------------------------------------------------------------------------------------------------------------------------------------------------------------------------------------------------------------------------------------------------------------------------------------------------------------------------------------------------------------------------------------------------------------------------------------------------------------------------------------------------------------------------------------------------------------------------------------------------------------------------------------------------------------------------------------------------------------------------------------------------------------------------------------------------------------------------------------------------------------------------------------------------------------------------------------------------------------------------------------------------------------------------------------------------------------------------------------------------------------------------------------------------------------------------------------------------------------------------------------------------------------------------------------------------------------------------------------------------------------------------------------------------------------------------------------------------------------------------------------------------------------------------------------------------------------------------------------------------------------------------------------------------------------------------------------------------------------------------------------------------------------------------------------------------------------------------------------------------------------------------------------------------------------------------------------------------------------------------------------------------------------------------------------------------------------------------------------------------------------------------------------------------------------------------------------------------------------------------------------|--------|
|     | ((KEYWORDS:(("Automated Information Processing"))) OR ((it:(("Machine Learning")))) OR ((KEYWORDS:(("neural network"))) OR ((KEYWORDS:(("neural networks"))) OR ((KEYWORDS:(("Artificial Neural Networks"))) OR ((it:(("Computational Modeling")))) OR ((KEYWORDS:(facebook)) OR (KEYWORDS:(internet)) OR (KEYWORDS:(online)) OR (KEYWORDS:(twitter)) OR (KEYWORDS:(("big data"))) OR (KEYWORDS:(cyber*)) OR (KEYWORDS:(instagram)) OR (KEYWORDS:(snapchat)) OR (KEYWORDS:(periscope)) OR (KEYWORDS:(("ask.fm"))) OR (KEYWORDS:(internet)) OR (KEYWORDS:(("deep learning"))) OR (((KEYWORDS:(mobile)) AND (KEYWORDS:(tech*))) OR (ti:(("social media"))) OR (abstract:(("social media"))) OR (ti:(("electronic health record"))) OR (abstract:(("electronic health record"))) OR (it:(("Data mining"))) OR (KEYWORDS:(("mining"))) OR (KEYWORDS:(("neural network"))) OR (KEYWORDS:(("neural networking"))) OR (KEYWORDS:(("neural networks"))) OR (KEYWORDS:(("neural networksbased"))) OR (it:(("artificial intelligence"))) OR ((KEYWORDS:(artificial)) AND (KEYWORDS:(intelligence))) OR (KEYWORDS:(("artificial intelligence"))) OR ((KEYWORDS:(computational)) AND (KEYWORDS:(intelligence))) OR (KEYWORDS:(("computational intelligence"))) OR (it:(("Computer Assisted language Learning"))) OR ((KEYWORDS:(natural)) AND (KEYWORDS:(language)) AND (KEYWORDS:(processing))) OR (KEYWORDS:(("natural language processing"))) OR (it:(("computer applications"))) OR (it:(("Cellular Phones"))) OR (KEYWORDS:(("Hot Line Services")) OR KEYWORDS:PHONE* OR KEYWORDS:TELEPHONE* OR KEYWORDS:(("Crisis Intervention Services")) OR KEYWORDS:Counselors OR KEYWORDS:(("Suicide Prevention Centers")) OR KEYWORDS:(("Telephone Systems")) OR (it:(("text Messaging")))) AND (((KEYWORDS:frequent* OR KEYWORDS:chronic*) AND (KEYWORDS:call* OR KEYWORDS:user*)) OR KEYWORDS: "Help Seeking Behavior" OR KEYWORDS: "Relapse (Disorders)" OR KEYWORDS: "repetitive self-harm" OR (KEYWORDS:repeat* NEAR/3 (KEYWORDS:call* OR KEYWORDS:user*)) OR (KEYWORDS:Repetit* NEAR/3 (KEYWORDS:call* OR KEYWORDS:user*)) OR (KEYWORDS: recidiv* NEAR/3 (KEYWORDS:call* OR KEYWORDS:user*)))                                                                                                                                                                                                                                                                                                                                                                             |        |
| 7   | (((KEYWORDS:(algorithm))) OR ((KEYWORDS:(("artificial intelligence")))) OR ((KEYWORDS:(("computational intelligence"))) OR ((KEYWORDS:(("big data")))) OR ((KEYWORDS:(("data mining")))) OR ((KEYWORDS:(("Pattern Discrimination")))) OR ((KEYWORDS:(("Pattern Recognition")))) OR ((KEYWORDS:(("Artificial Intelligence")))) OR ((KEYWORDS:(("Automated Information Processing"))) OR ((it:(("Machine Learning")))) OR ((KEYWORDS:(("neural network"))) OR ((KEYWORDS:(("neural networks"))) OR ((KEYWORDS:(("Artificial Neural Networks"))) OR ((it:(("Computational Modeling")))) OR (KEYWORDS:(facebook)) OR (KEYWORDS:(internet)) OR (KEYWORDS:(online)) OR (KEYWORDS:(twitter)) OR (KEYWORDS:(("big data"))) OR (KEYWORDS:(cyber*)) OR (KEYWORDS:(instagram)) OR (KEYWORDS:(snapchat)) OR (KEYWORDS:(periscope)) OR (KEYWORDS:(("ask.fm"))) OR (KEYWORDS:(internet)) OR (KEYWORDS:(("deep learning"))) OR (((KEYWORDS:(mobile)) AND (KEYWORDS:(tech*))) OR (ti:(("social media"))) OR (abstract:(("social media"))) OR (ti:(("electronic health record"))) OR (abstract:(("electronic health record"))) OR (it:(("Data mining"))) OR (KEYWORDS:(("mining"))) OR (KEYWORDS:(("neural network"))) OR (KEYWORDS:(("neural networking"))) OR (KEYWORDS:(("neural networks"))) OR (KEYWORDS:(("neural networksbased"))) OR (it:(("artificial intelligence"))) OR ((KEYWORDS:(artificial)) AND (KEYWORDS:(intelligence))) OR (KEYWORDS:(("artificial intelligence"))) OR ((KEYWORDS:(computational)) AND (KEYWORDS:(intelligence))) OR (KEYWORDS:(("computational intelligence"))) OR (it:(("Computer Assisted language Learning"))) OR ((KEYWORDS:(natural)) AND (KEYWORDS:(language)) AND (KEYWORDS:(processing))) OR (KEYWORDS:(("natural language processing"))) OR (it:(("computer applications"))) OR (it:(("Cellular Phones"))) OR (KEYWORDS:(("Hot Line Services")) OR KEYWORDS:PHONE* OR KEYWORDS:TELEPHONE* OR KEYWORDS:(("Crisis Intervention Services")) OR KEYWORDS:Counselors OR KEYWORDS:(("Suicide Prevention Centers")) OR KEYWORDS:(("Telephone Systems")) OR (it:(("text Messaging")))) AND (((KEYWORDS:frequent* OR KEYWORDS:chronic*) AND (KEYWORDS:call* OR KEYWORDS:user*)) OR (KEYWORDS: "Help Seeking Behavior" AND sKEYWORDS:ucid*) OR (KEYWORDS: "Relapse (Disorders)" AND sKEYWORDS:ucid*) OR KEYWORDS: "repetitive self-harm" OR (KEYWORDS:repeat* NEAR/3 (KEYWORDS:call* OR KEYWORDS:user*)) OR (KEYWORDS:Repetit* NEAR/3 (KEYWORDS:call* OR KEYWORDS:user*)) OR (KEYWORDS: recidiv* NEAR/3 (KEYWORDS:call* OR KEYWORDS:user*))) | 232    |
| 777 | (((KEYWORDS:Repetit* NEAR/3 (KEYWORDS:call* OR KEYWORDS:user* OR KEYWORDS:texter* OR KEYWORDS:chater*)) OR (KEYWORDS: recidiv* NEAR/3                                                                                                                                                                                                                                                                                                                                                                                                                                                                                                                                                                                                                                                                                                                                                                                                                                                                                                                                                                                                                                                                                                                                                                                                                                                                                                                                                                                                                                                                                                                                                                                                                                                                                                                                                                                                                                                                                                                                                                                                                                                                                                                                                                                                                                                                                                                                                                                                                          | 32 815 |

|                   |                                                                                                                                                                                                                                                                                                                                                                                                                                                                                                                                                                                                                                                                                                                                                                                                                                                                                                                                                                                                                                                                                                                                                                                                                                                                                                                                                                                            |        |
|-------------------|--------------------------------------------------------------------------------------------------------------------------------------------------------------------------------------------------------------------------------------------------------------------------------------------------------------------------------------------------------------------------------------------------------------------------------------------------------------------------------------------------------------------------------------------------------------------------------------------------------------------------------------------------------------------------------------------------------------------------------------------------------------------------------------------------------------------------------------------------------------------------------------------------------------------------------------------------------------------------------------------------------------------------------------------------------------------------------------------------------------------------------------------------------------------------------------------------------------------------------------------------------------------------------------------------------------------------------------------------------------------------------------------|--------|
|                   | <p>(KEYWORDS:call* OR KEYWORDS:user* OR KEYWORDS:texter* OR KEYWORDS:chater*) OR (KEYWORDS:frequent NEAR/3 (KEYWORDS:call* OR KEYWORDS:user* OR KEYWORDS:texter* OR KEYWORDS:chater*)) OR (KEYWORDS:chronic* NEAR/3 (KEYWORDS:call* OR KEYWORDS:user* OR KEYWORDS:texter* OR KEYWORDS:chater*)) OR (KEYWORDS:habitu* NEAR/3 (KEYWORDS:call* OR KEYWORDS:user* OR KEYWORDS:texter* OR KEYWORDS:chater*)) OR (KEYWORDS:usual* NEAR/3 (KEYWORDS:call* OR KEYWORDS:user* OR KEYWORDS:texter* OR KEYWORDS:chater*)) OR (KEYWORDS:multipl* NEAR/3 (KEYWORDS:call* OR KEYWORDS:user* OR KEYWORDS:texter* OR KEYWORDS:chater*)) OR ((ABSTRACT:Repetit* NEAR/3 (ABSTRACT:call* OR ABSTRACT:user* OR ABSTRACT:texter* OR ABSTRACT:chater*)) OR (ABSTRACT:recidiv* NEAR/3 (ABSTRACT:call* OR ABSTRACT:user* OR ABSTRACT:texter* OR ABSTRACT:chater*)) OR (ABSTRACT:frequent NEAR/3 (ABSTRACT:call* OR ABSTRACT:user* OR ABSTRACT:texter* OR ABSTRACT:chater*)) OR (ABSTRACT:chronic* NEAR/3 (ABSTRACT:call* OR ABSTRACT:user* OR ABSTRACT:texter* OR ABSTRACT:chater*)) OR (ABSTRACT:habitu* NEAR/3 (ABSTRACT:call* OR ABSTRACT:user* OR ABSTRACT:texter* OR ABSTRACT:chater*)) OR (ABSTRACT:usual* NEAR/3 (ABSTRACT:call* OR ABSTRACT:user* OR ABSTRACT:texter* OR ABSTRACT:chater*)) OR (ABSTRACT:multipl* NEAR/3 (ABSTRACT:call* OR ABSTRACT:user* OR ABSTRACT:texter* OR ABSTRACT:chater*))))</p> |        |
| 888               | <p>(KEYWORDS:suicid* OR ABSTRACT:suicid* OR KEYWORDS:"Self-Destructive Behavior" OR ABSTRACT:"Self-Destructive Behavior" OR KEYWORDS:"repetitive self-harm" OR ABSTRACT:"repetitive self-harm")</p>                                                                                                                                                                                                                                                                                                                                                                                                                                                                                                                                                                                                                                                                                                                                                                                                                                                                                                                                                                                                                                                                                                                                                                                        | 67 508 |
| 777 AND 888 = 999 | <p>((KEYWORDS:suicid* OR ABSTRACT:suicid* OR KEYWORDS:"Self-Destructive Behavior" OR ABSTRACT:"Self-Destructive Behavior" OR KEYWORDS:"repetitive self-harm" OR ABSTRACT:"repetitive self-harm") AND (((KEYWORDS:Repetit* NEAR/3 (KEYWORDS:call* OR KEYWORDS:user* OR KEYWORDS:texter* OR KEYWORDS:chater*)) OR (KEYWORDS:recidiv* NEAR/3 (KEYWORDS:call* OR KEYWORDS:user* OR KEYWORDS:texter* OR KEYWORDS:chater*)) OR (KEYWORDS:frequent NEAR/3 (KEYWORDS:call* OR KEYWORDS:user* OR KEYWORDS:texter* OR KEYWORDS:chater*)) OR (KEYWORDS:chronic* NEAR/3 (KEYWORDS:call* OR KEYWORDS:user* OR</p>                                                                                                                                                                                                                                                                                                                                                                                                                                                                                                                                                                                                                                                                                                                                                                                       | 498    |

|             |                                                                                                                                                                                                                                                                                                                                                                                                                                                                                                                                                                                                                                                                                                                                                                                                                                                                                                                                                                                                                                                                                                                                                 |     |
|-------------|-------------------------------------------------------------------------------------------------------------------------------------------------------------------------------------------------------------------------------------------------------------------------------------------------------------------------------------------------------------------------------------------------------------------------------------------------------------------------------------------------------------------------------------------------------------------------------------------------------------------------------------------------------------------------------------------------------------------------------------------------------------------------------------------------------------------------------------------------------------------------------------------------------------------------------------------------------------------------------------------------------------------------------------------------------------------------------------------------------------------------------------------------|-----|
|             | <p><b>KEYWORDS:texter* OR KEYWORDS:chater*)) OR (KEYWORDS: habitu* NEAR/3 (KEYWORDS:call* OR KEYWORDS:user* OR KEYWORDS:texter* OR KEYWORDS:chater*)) OR (KEYWORDS:usual* NEAR/3 (KEYWORDS:call* OR KEYWORDS:user* OR KEYWORDS:texter* OR KEYWORDS:chater*)) OR (KEYWORDS:multipl* NEAR/3 (KEYWORDS:call* OR KEYWORDS:user* OR KEYWORDS:texter* OR KEYWORDS:chater*)) OR ((ABSTRACT:Repetit* NEAR/3 (ABSTRACT:call* OR ABSTRACT:user* OR ABSTRACT:texter* OR ABSTRACT:chater*)) OR (ABSTRACT: recidiv* NEAR/3 (ABSTRACT:call* OR ABSTRACT:user* OR ABSTRACT:texter* OR ABSTRACT:chater*)) OR (ABSTRACT:frequent NEAR/3 (ABSTRACT:call* OR ABSTRACT:user* OR ABSTRACT:texter* OR ABSTRACT:chater*)) OR (ABSTRACT:chronic* NEAR/3 (ABSTRACT:call* OR ABSTRACT:user* OR ABSTRACT:texter* OR ABSTRACT:chater*)) OR (ABSTRACT: habitu* NEAR/3 (ABSTRACT:call* OR ABSTRACT:user* OR ABSTRACT:texter* OR ABSTRACT:chater*)) OR (ABSTRACT:usual* NEAR/3 (ABSTRACT:call* OR ABSTRACT:user* OR ABSTRACT:texter* OR ABSTRACT:chater*)) OR (ABSTRACT:multipl* NEAR/3 (ABSTRACT:call* OR ABSTRACT:user* OR ABSTRACT:texter* OR ABSTRACT:chater*)))))</b></p> |     |
| 555         | <p>(ABSTRACT:"Cellular Phones" OR ABSTRACT:"Hot Line Services" OR ABSTRACT:PHONE* OR ABSTRACT:telephone* OR ABSTRACT:Crisis Intervention Services OR ABSTRACT:"Suicide Prevention Centers" OR ABSTRACT:"Telephone Systems" OR ABSTRACT:"text Messaging" OR ABSTRACT:mobile* OR ABSTRACT:"Hot Line Services" OR KEYWORDS:"Cellular Phones" OR KEYWORDS:"Hot Line Services" OR KEYWORDS:PHONE* OR KEYWORDS:telephone* OR KEYWORDS:Crisis Intervention Services OR KEYWORDS:"Suicide Prevention Centers" OR KEYWORDS:"Telephone Systems" OR KEYWORDS:"text Messaging" OR KEYWORDS:mobile* OR KEYWORDS:"Hot Line Services")</p>                                                                                                                                                                                                                                                                                                                                                                                                                                                                                                                     |     |
| 999+555=111 | <p>((KEYWORDS:suicid* OR ABSTRACT:suicid* OR KEYWORDS:"Self-Destructive Behavior" OR ABSTRACT:"Self-Destructive Behavior" OR KEYWORDS:"repetitive self-harm" OR ABSTRACT:"repetitive self-harm" OR (KEYWORDS:suicid* AND KEYWORDS:"Help Seeking Behavior") OR (ABSTRACT:suicid* AND ABSTRACT:"Help Seeking Behavior") OR KEYWORDS:"crisis center" OR ABSTRACT:"crisis center" OR KEYWORDS:"crisis intervention" OR ABSTRACT:"crisis intervention" OR KEYWORDS: helpline* OR ABSTRACT:helpline*) AND (((KEYWORDS:Repetit* NEAR/3 (KEYWORDS:call* OR KEYWORDS:user* OR KEYWORDS:texter* OR KEYWORDS:chater*)) OR (KEYWORDS: recidiv* NEAR/3 (KEYWORDS:call* OR KEYWORDS:user* OR KEYWORDS:texter* OR KEYWORDS:chater*)) OR (KEYWORDS:frequen* NEAR/3</p>                                                                                                                                                                                                                                                                                                                                                                                          | 599 |

|               |                                                                                                                                                                                                                                                                                                                                                                                                                                                                                                                                                                                                                                                                                                                                                                                                                                                                                                                                                                                                                                                                                                                                                                                                                                                                                                                                                                                                                                                                                                                                                                                                                                                                                                                                                                                                                                                                                                         |                |
|---------------|---------------------------------------------------------------------------------------------------------------------------------------------------------------------------------------------------------------------------------------------------------------------------------------------------------------------------------------------------------------------------------------------------------------------------------------------------------------------------------------------------------------------------------------------------------------------------------------------------------------------------------------------------------------------------------------------------------------------------------------------------------------------------------------------------------------------------------------------------------------------------------------------------------------------------------------------------------------------------------------------------------------------------------------------------------------------------------------------------------------------------------------------------------------------------------------------------------------------------------------------------------------------------------------------------------------------------------------------------------------------------------------------------------------------------------------------------------------------------------------------------------------------------------------------------------------------------------------------------------------------------------------------------------------------------------------------------------------------------------------------------------------------------------------------------------------------------------------------------------------------------------------------------------|----------------|
|               | <p>(KEYWORDS:call* OR KEYWORDS:user* OR KEYWORDS:texter* OR KEYWORDS:chater*) OR (KEYWORDS:chronic* NEAR/3 (KEYWORDS:call* OR KEYWORDS:user* OR KEYWORDS:texter* OR KEYWORDS:chater*)) OR (KEYWORDS: habitu* NEAR/3 (KEYWORDS:call* OR KEYWORDS:user* OR KEYWORDS:texter* OR KEYWORDS:chater*)) OR (KEYWORDS:usual* NEAR/3 (KEYWORDS:call* OR KEYWORDS:user* OR KEYWORDS:texter* OR KEYWORDS:chater*)) OR (KEYWORDS:multipl* NEAR/3 (KEYWORDS:call* OR KEYWORDS:user* OR KEYWORDS:texter* OR KEYWORDS:chater*)) OR ((ABSTRACT:Repetit* NEAR/3 (ABSTRACT:call* OR ABSTRACT:user* OR ABSTRACT:texter* OR ABSTRACT:chater*)) OR (ABSTRACT: recidiv* NEAR/3 (ABSTRACT:call* OR ABSTRACT:user* OR ABSTRACT:texter* OR ABSTRACT:chater*)) OR (ABSTRACT:frequen* NEAR/3 (ABSTRACT:call* OR ABSTRACT:user* OR ABSTRACT:texter* OR ABSTRACT:chater*)) OR (ABSTRACT:chronic* NEAR/3 (ABSTRACT:call* OR ABSTRACT:user* OR ABSTRACT:texter* OR ABSTRACT:chater*)) OR (ABSTRACT: habitu* NEAR/3 (ABSTRACT:call* OR ABSTRACT:user* OR ABSTRACT:texter* OR ABSTRACT:chater*)) OR (ABSTRACT:usual* NEAR/3 (ABSTRACT:call* OR ABSTRACT:user* OR ABSTRACT:texter* OR ABSTRACT:chater*)) OR (ABSTRACT:multipl* NEAR/3 (ABSTRACT:call* OR ABSTRACT:user* OR ABSTRACT:texter* OR ABSTRACT:chater*)) AND (ABSTRACT:"Cellular Phones" OR ABSTRACT:"Hot Line Services" OR ABSTRACT:PHON* OR ABSTRACT:telephon* OR ABSTRACT:Crisis Intervention Services OR ABSTRACT:"Suicide Prevention Centers" OR ABSTRACT:"Telephone Systems" OR ABSTRACT:"text Messaging" OR ABSTRACT:mobile* OR ABSTRACT:"Hot Line Services" OR KEYWORDS:"Cellular Phones" OR KEYWORDS:"Hot Line Services" OR KEYWORDS:PHON* OR KEYWORDS:telephon* OR KEYWORDS:Crisis Intervention Services OR KEYWORDS:"Suicide Prevention Centers" OR KEYWORDS:"Telephone Systems" OR KEYWORDS:"text Messaging" OR KEYWORDS:mobile* OR KEYWORDS:"Hot Line Services")</p> |                |
| <p>Pubmed</p> |                                                                                                                                                                                                                                                                                                                                                                                                                                                                                                                                                                                                                                                                                                                                                                                                                                                                                                                                                                                                                                                                                                                                                                                                                                                                                                                                                                                                                                                                                                                                                                                                                                                                                                                                                                                                                                                                                                         |                |
| <p>1</p>      | <p>((((algorithm*[TIAB] OR facebook OR internet OR online OR twitter OR "big data" OR cyber* OR instagram OR snapchat OR periscope OR "ask.fm" OR internet OR "machine learning"[MeSH Terms] OR "deep learning"[TIAB] OR phone* OR mobile* OR telephone* OR "machine learning"[TIAB] OR "algorithms"[MeSH Terms]))) OR (("mobile tech*[TIAB] OR "social media"[TIAB] OR "electronic health record"[TIAB] OR "mining"[MeSH Terms] OR "mining"[TIAB] OR "neural network"[TIAB] OR "artificial intelligence"[MeSH Terms] OR "artificial intelligence"[TIAB] OR "computational intelligence"[TIAB] OR "natural language processing"[MeSH Terms] OR "natural language processing"[TIAB] OR "NLP"[TIAB] OR "mobile applications"[MeSH Terms] OR "cell phones"[MeSH Terms] OR "text messaging"[MeSH Terms]))) OR ("Crisis Intervention/methods"[Mesh] OR "Crisis Intervention/statistics &amp; numerical data"[Mesh] OR "Crisis Intervention"[Mesh] OR "Telephone"[Mesh] OR "Hotlines"[Mesh] OR "Health Services Misuse"[Mesh])</p>                                                                                                                                                                                                                                                                                                                                                                                                                                                                                                                                                                                                                                                                                                                                                                                                                                                                            | <p>921 940</p> |



|   |                                                                                                                                                                                                                                                                                                                                                                                                                                                                                                                                                                                                                                                                                                                                                                                                                                                                                                                                                                                                                                                                       |         |
|---|-----------------------------------------------------------------------------------------------------------------------------------------------------------------------------------------------------------------------------------------------------------------------------------------------------------------------------------------------------------------------------------------------------------------------------------------------------------------------------------------------------------------------------------------------------------------------------------------------------------------------------------------------------------------------------------------------------------------------------------------------------------------------------------------------------------------------------------------------------------------------------------------------------------------------------------------------------------------------------------------------------------------------------------------------------------------------|---------|
| 2 | <p>((("Self-Injurious Behavior/prevention &amp; control"[Mesh] OR "Suicide/prevention &amp; control"[Mesh] OR Recurrence[Mesh] OR "Help Seeking Behavior" OR "Relapse Disorders"[TI] OR "repetitive self-harm"[TI] OR repeat*[TI] OR Repetit*[TI] OR re-present*[TI] OR repetition[TI] OR recur*[TI] OR recidiv*[TI]) OR ((repeat*[TI] AND (call*[TI] OR user*[TI])) OR (Repetit*[TI] AND (call*[TI] OR user*[TI])) OR ( recidiv*[TI] AND (call*[TI] OR user*[TI]))))</p>                                                                                                                                                                                                                                                                                                                                                                                                                                                                                                                                                                                             | 326 080 |
| 3 | <p>((("Self-Injurious Behavior/prevention &amp; control"[Mesh] OR "Suicide/prevention &amp; control"[Mesh] OR Recurrence[Mesh] OR "Help Seeking Behavior") AND ("Relapse Disorders"[TI] OR "repetitive self-harm"[TI] OR repeat*[TI] OR Repetit*[TI] OR re-present*[TI] OR repetition[TI] OR recur*[TI] OR recidiv*[TI]) OR ((repeat*[TI] AND (call*[TI] OR user*[TI])) OR (Repetit*[TI] AND (call*[TI] OR user*[TI])) OR ( recidiv*[TI] AND (call*[TI] OR user*[TI]))))</p>                                                                                                                                                                                                                                                                                                                                                                                                                                                                                                                                                                                          | 46 647  |
| 4 | <p>(((((algorithm*[TI] OR facebook[TI] OR internet[TI] OR online[TI] OR twitter[TI] OR "big data"[TI] OR cyber*[TI] OR instagram[TI] OR snapchat[TI] OR periscope[TI] OR "ask.fm"[TI] OR internet[TI] OR "machine learning"[MeSH Terms] OR "deep learning"[TI] OR phone*[TIAB] OR mobile*[TIAB] OR telephone*[TIAB] OR "machine learning"[TI] OR "algorithms"[MeSH Terms]))) OR ((("mobile tech*[TI] OR "social media"[TI] OR "electronic health record"[TI] OR "mining"[MeSH Terms] OR "mining"[TI] OR "neural network"[TI] OR "artificial intelligence"[MeSH Terms] OR "artificial intelligence"[TI] OR "computational intelligence"[TI] OR "natural language processing"[MeSH Terms] OR "natural language processing"[TI] OR "NLP"[TI] OR "mobile applications"[MeSH Terms] OR "cell phones"[MeSH Terms] OR "text messaging"[MeSH Terms]))) OR ("Crisis Intervention/methods"[Mesh] OR "Crisis Intervention/statistics &amp; numerical data"[Mesh] OR "Crisis Intervention"[Mesh] OR "Telephone"[Mesh] OR "Hotlines"[Mesh] OR "Health Services Misuse"[Mesh]))</p> | 564 360 |
| 5 | 3 AND 4                                                                                                                                                                                                                                                                                                                                                                                                                                                                                                                                                                                                                                                                                                                                                                                                                                                                                                                                                                                                                                                               | 572     |
| 6 | <p>(((((("Self-Injurious Behavior/prevention &amp; control"[Mesh] OR "Suicide/prevention &amp; control"[Mesh] OR (Recurrence[Mesh] AND suicid*[TI]) OR ("Help Seeking Behavior"[Mesh] AND suicid*[TI])) AND ((("Relapse Disorders"[TI] AND suicid*[TI]) OR "repetitive self-harm"[TI] OR repeat*[TI] OR Repetit*[TI] OR re-present*[TI] OR repetition[TI] OR recur*[TI] OR recidiv*[TI]) OR ((frequent*[TI] OR chronic*[TI]) AND (call*[TI] OR user*[TI])) OR ((repeat*[TI] AND (call*[TI] OR user*[TI])) OR (Repetit*[TI] AND (call*[TI] OR user*[TI])) OR ( recidiv*[TI] AND (call*[TI] OR user*[TI]))))</p>                                                                                                                                                                                                                                                                                                                                                                                                                                                        | 1441    |
|   |                                                                                                                                                                                                                                                                                                                                                                                                                                                                                                                                                                                                                                                                                                                                                                                                                                                                                                                                                                                                                                                                       |         |

|                    |                                                                                                                                                                                                                                                                                                                                                                                                                                                                                                                                                                                                                                                                                                                                                                                                                                                                                                                                                                                                                                                                                                                                                                                                                                                                                                                                                                                                                                                                                                                                                                                                                                                      |         |
|--------------------|------------------------------------------------------------------------------------------------------------------------------------------------------------------------------------------------------------------------------------------------------------------------------------------------------------------------------------------------------------------------------------------------------------------------------------------------------------------------------------------------------------------------------------------------------------------------------------------------------------------------------------------------------------------------------------------------------------------------------------------------------------------------------------------------------------------------------------------------------------------------------------------------------------------------------------------------------------------------------------------------------------------------------------------------------------------------------------------------------------------------------------------------------------------------------------------------------------------------------------------------------------------------------------------------------------------------------------------------------------------------------------------------------------------------------------------------------------------------------------------------------------------------------------------------------------------------------------------------------------------------------------------------------|---------|
| 7                  | <b>6 AND 4</b>                                                                                                                                                                                                                                                                                                                                                                                                                                                                                                                                                                                                                                                                                                                                                                                                                                                                                                                                                                                                                                                                                                                                                                                                                                                                                                                                                                                                                                                                                                                                                                                                                                       | 115     |
| 666                | <p>((("Self-Injurious Behavior"[Mesh] OR "Suicide"[Mesh] OR (Recurrence[Mesh] AND suicid*[Mesh]) OR ("Help Seeking Behavior"[Mesh] AND suicid*[Mesh]) OR suicid*[Mesh] OR suicide[Mesh] OR ("Relapse Disorders"[Mesh] AND suicid*[Mesh]) OR ("repetitive self-harm"[Mesh] OR repeat*[Mesh] OR Repetit*[Mesh] OR re-present*[Mesh] OR repetition[Mesh] OR recur*[Mesh] OR recidiv*[Mesh]) AND suicid*[Mesh]) OR ("repetitive self-harm"[Mesh] OR repeat*[Mesh] OR Repetit*[Mesh] OR re-present*[Mesh] OR repetition[Mesh] OR recur*[Mesh] OR recidiv*[Mesh]) AND suicid*[Mesh])) AND ((frequent*[Mesh] OR chronic*[Mesh] OR habitu*[Mesh] OR usual*[Mesh] OR repeat*[Mesh] OR Repetit*[Mesh] OR multipl*[Mesh]) AND (call*[Mesh] OR user*[Mesh] OR texter*[Mesh] OR chater*[Mesh] OR "Health Services Misuse"[Mesh]))) OR ("Self-Injurious Behavior"[Mesh] OR "Suicide"[Mesh] OR (Recurrence[Mesh] AND suicid*[TIAB]) OR ("Help Seeking Behavior"[Mesh] AND suicid*[TIAB]) OR suicid*[TIAB] OR suicide[Mesh] OR ("Relapse Disorders"[TIAB] AND suicid*[TIAB]) OR ((("repetitive self-harm"[TIAB] OR repeat*[TIAB] OR Repetit*[TIAB] OR re-present*[TIAB] OR repetition[TIAB] OR recur*[TIAB] OR recidiv*[TIAB]) AND suicid*[TIAB]) OR ((("repetitive self-harm"[TIAB] OR repeat*[TIAB] OR Repetit*[TIAB] OR re-present*[TIAB] OR repetition[TIAB] OR recur*[TIAB] OR recidiv*[TIAB]) AND suicid*[Mesh])) AND ((frequent*[TIAB] OR chronic*[TIAB] OR "Health Services Misuse"[Mesh] OR habitu*[TIAB] OR usual*[TIAB] OR repeat*[TIAB] OR Repetit*[TIAB] OR multipl*[TIAB]) AND (call*[TIAB] OR user*[TIAB] OR texter*[TIAB] OR chater*[TIAB]))))))</p> | 783     |
| 222                | <p>("mobile applications"[Mesh] OR "cell phones"[Mesh] OR "text messaging"[Mesh] "Crisis Intervention"[Mesh] OR "Telephone"[Mesh] OR "Hotlines"[Mesh] OR "Health Services Misuse"[Mesh] OR "mobile applications"[TIAB] OR "cell phones"[TIAB] OR "text messaging"[TIAB] "Crisis Intervention"[TIAB] OR "Telephone"[TIAB] OR "Hotlines"[TIAB] OR "Health Services Misuse"[TIAB] OR "Cellular Phones"[TIAB] OR "Hot Line Services"[TIAB] OR PHONE*[TIAB] OR telephone*[TIAB] OR "Crisis Intervention Services"[TIAB] OR "Suicide Prevention Centers"[TIAB] OR "Telephone Systems"[TIAB] OR "text Messaging"[TIAB] OR mobile*[TIAB] OR "Hot Line Services"[TIAB])</p>                                                                                                                                                                                                                                                                                                                                                                                                                                                                                                                                                                                                                                                                                                                                                                                                                                                                                                                                                                                   | 181 118 |
| 666 AND 222 = 1976 | <p>((("Self-Injurious Behavior"[Mesh] OR "Suicide"[Mesh] OR ("Help Seeking Behavior"[Mesh] AND suicid*[Mesh]) OR suicid*[Mesh] OR suicide[Mesh] OR "crisis center"[Mesh] OR "Crisis Intervention"[Mesh] OR "Crisis Intervention"[TIAB] OR Helplines[Mesh] OR Helpline*[TIAB] OR "Self-Injurious Behavior"[TIAB] OR "Suicide"[TIAB] OR ("Help Seeking Behavior"[TIAB] AND suicid*[TIAB]) OR suicid*[TIAB] OR suicide[TIAB] OR "crisis center"[TIAB] OR "Crisis Intervention"[TIAB] OR "Crisis Intervention"[TIAB] OR Helplines[TIAB] OR Helpline*[TIAB]) AND</p>                                                                                                                                                                                                                                                                                                                                                                                                                                                                                                                                                                                                                                                                                                                                                                                                                                                                                                                                                                                                                                                                                      | 195     |

|  |                                                                                                                                                                                                                                                                                                                                                                                                                                                                                                                                                                                                                                                                                                                                                                                                                                                                                                                                                                                                                                                                                                                                         |  |
|--|-----------------------------------------------------------------------------------------------------------------------------------------------------------------------------------------------------------------------------------------------------------------------------------------------------------------------------------------------------------------------------------------------------------------------------------------------------------------------------------------------------------------------------------------------------------------------------------------------------------------------------------------------------------------------------------------------------------------------------------------------------------------------------------------------------------------------------------------------------------------------------------------------------------------------------------------------------------------------------------------------------------------------------------------------------------------------------------------------------------------------------------------|--|
|  | <p><b>((frequen*[TIAB] OR chronic*[TIAB] OR "Health Services Misuse"[Mesh] OR habitu*[TIAB] OR usual*[TIAB] OR repeat*[TIAB] OR Repetit*[TIAB] OR multipl*[TIAB] OR frequen*[Mesh] OR chronic*[Mesh] OR "Health Services Misuse"[Mesh] OR habitu*[Mesh] OR usual*[Mesh] OR repeat*[Mesh] OR Repetit*[Mesh] OR multipl*[Mesh]) AND (call*[TIAB] OR user*[TIAB] OR texter*[TIAB] OR chater*[TIAB] OR call*[Mesh] OR user*[Mesh] OR texter*[Mesh] OR chater*[Mesh])) AND ("mobile applications"[Mesh] OR "cell phones"[Mesh] OR "text messaging"[Mesh] "Crisis Intervention"[Mesh] OR "Telephone"[Mesh] OR "Hotlines"[Mesh] OR "Health Services Misuse"[Mesh] OR "mobile applications"[TIAB] OR "cell phones"[TIAB] OR "text messaging"[TIAB] "Crisis Intervention"[TIAB] OR "Telephone"[TIAB] OR "Hotlines"[TIAB] OR "Health Services Misuse"[TIAB] OR "Cellular Phones"[TIAB] OR "Hot Line Services"[TIAB] OR PHON*[TIAB] OR telephon*[TIAB] OR "Crisis Intervention Services"[TIAB] OR "Suicide Prevention Centers"[TIAB] OR "Telephone Systems"[TIAB] OR "text Messaging"[TIAB] OR mobile*[TIAB] OR "Hot Line Services"[TIAB])</b></p> |  |
|--|-----------------------------------------------------------------------------------------------------------------------------------------------------------------------------------------------------------------------------------------------------------------------------------------------------------------------------------------------------------------------------------------------------------------------------------------------------------------------------------------------------------------------------------------------------------------------------------------------------------------------------------------------------------------------------------------------------------------------------------------------------------------------------------------------------------------------------------------------------------------------------------------------------------------------------------------------------------------------------------------------------------------------------------------------------------------------------------------------------------------------------------------|--|
